# Supplementary material for: Breeding high-yielding drought-tolerant rice: genetic variations and conventional and molecular approaches
Source: PubMed Central journal article supplement (PMC4223988; doi:10.1093/jxb/eru363), 2014-09-09

# **Breeding high-yielding drought-tolerant rice: genetic variations and conventional and molecular approaches**

*Arvind Kumar, Shalabh Dixit, T Ram, R B Yadaw, K K Mishra, and N P Mandal*

## **Supplementary Data**

Supplementary Tables S1-S2 – see separate file

Figure S1: Difference in plant types and drought response of upland-adapted and lowland-adapted cultivars under severe drought.

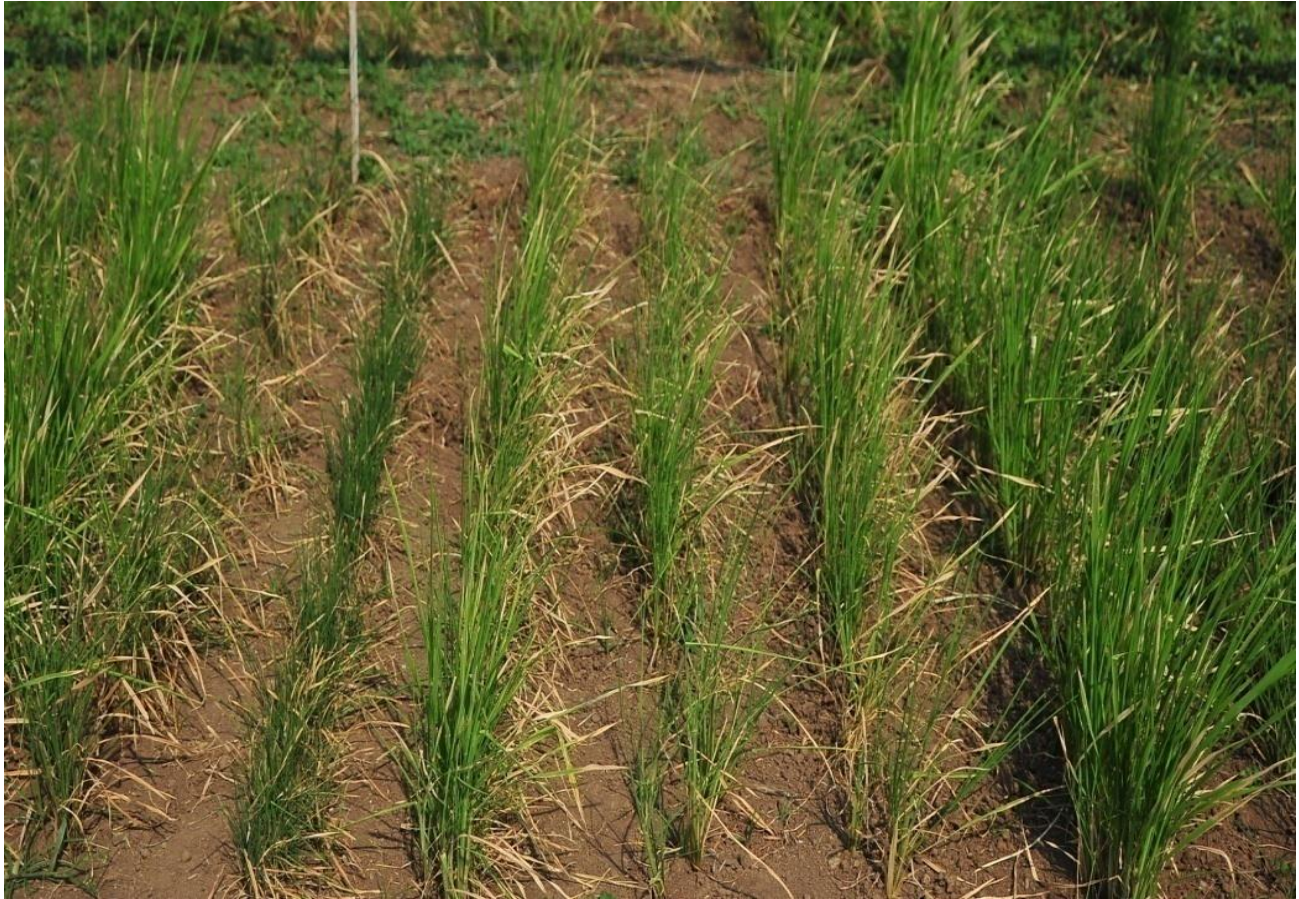

Supplement: supp_eru363_jexbot120972_file002.pdf [file supp_eru363_jexbot120972_file002.pdf]
